# Supplementary material
Source: publisher site journal article supplement (https://www.spandidos-publications.com/5791/downloadSupplementary)
Supplement: Supplementary file 1 [file downloadSupplementary]

**Table SI.** Literature search tracking information.

| <b>Date of search</b> | <b>Database</b>  | <b>Years searched</b> | <b>Keywords</b>                                                                                                                       | <b>Number of records</b> |
|-----------------------|------------------|-----------------------|---------------------------------------------------------------------------------------------------------------------------------------|--------------------------|
| 09/01/2021            | MEDLINE in Ovid  | 1990-2021             | laryngeal mask, LMA, endotracheal tube, tracheal tube, children, pediatric, anesthesia, RCT, randomized controlled trials, randomized | 223                      |
| 09/01/2021            | Embase           | 1990-2021             | laryngeal mask, LMA, endotracheal tube, tracheal tube, children, pediatric, anesthesia, RCT, randomized controlled trials, randomized | 432                      |
| 09/01/2021            | Cochrane Library | 1990-2021             | laryngeal mask, LMA, endotracheal tube, tracheal tube, children, pediatric, anesthesia, RCT, randomized controlled trials, randomized | 245                      |
| 09/01/2021            | Web of Science   | 1990-2021             | laryngeal mask, LMA, endotracheal tube, tracheal tube, children, pediatric, anesthesia, RCT, randomized controlled trials, randomized | 267                      |
| 09/01/2021            | PubMed           | 1990-2021             | laryngeal mask, LMA, endotracheal tube, tracheal tube, children, pediatric, anesthesia, RCT, randomized controlled trials, randomized | 25                       |
| 09/01/2021            | Google Scholar   | 1990-2021             | laryngeal mask, LMA, endotracheal tube, tracheal tube, children, pediatric, anesthesia, RCT, randomized controlled trials, randomized | 456                      |

LMA, laryngeal mask airway, RCT, randomized controlled trial.
